# Supplementary material
Source: Springer Nature journal article supplement (https://www.springermedizin.de/resource/supplementary/13054_2013_2448_MOESM2_ESM.pdf/9713998)

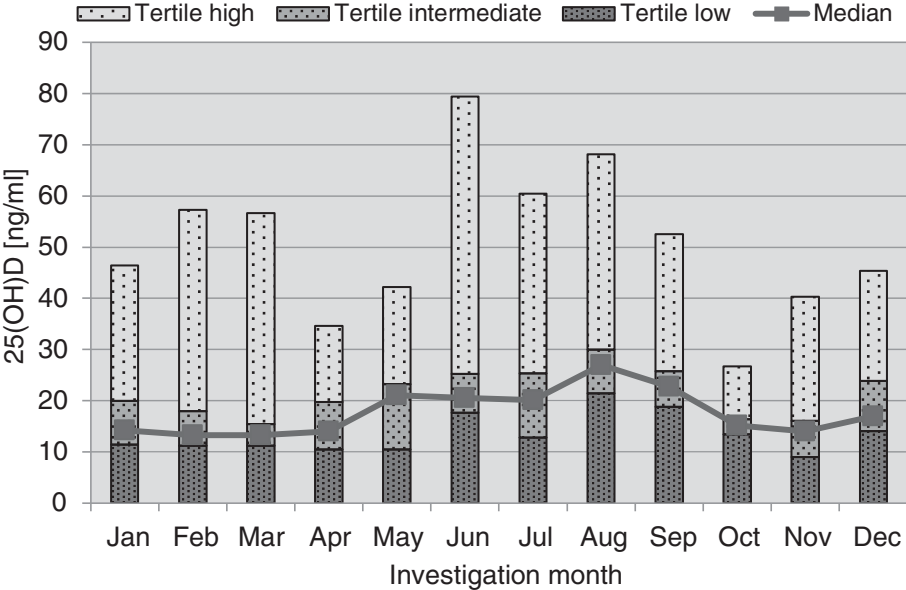

Supplement: MOESM2 [file 9713998]
